# Supplementary material for: Small angle X-ray scattering coupled with in situ electromechanical probing of nanoparticle-based resistive strain gauges
Source: Royal Society of Chemistry journal article supplement (doi:10.1039/c4nr04129a), 2014-01-01
Supplement: c4nr04129a1.pdf [file c4nr04129a1.pdf]

## Supporting Information

### Small Angle X-ray Scattering Coupled With *in-situ* Electromechanical Probing of Nanoparticle-Based Resistive Strain Gauges

Nicolas Decorde,<sup>a</sup> Neralagatta M. Sangeetha,<sup>a</sup> Benoit Viallet,<sup>a</sup> Guillaume Viau,<sup>a</sup> Jérémie Grisolia,<sup>a</sup> Alessandro Coati,<sup>b</sup> Alina Vlad,<sup>b</sup> Yves Garreau<sup>b,c</sup> and Laurence Ressier <sup>\*a</sup>

<sup>a</sup> *Université de Toulouse, LPCNO, INSA-CNRS-UPS,  
135 avenue de Rangueil, Toulouse 31077, France.  
Fax: +33561559697; Tel: +33561559672  
\*E-mail: laurence.ressier@insa-toulouse.fr*

<sup>b</sup> *Synchrotron SOLEIL,  
L'Orme des Merisiers Saint-Aubin - BP 48, Gif-sur-Yvette 91192, France.*

<sup>c</sup> *Université Paris Diderot,  
Sorbonne Paris Cité, MPQ, UMR 7162 CNRS, Paris 75013, France.*

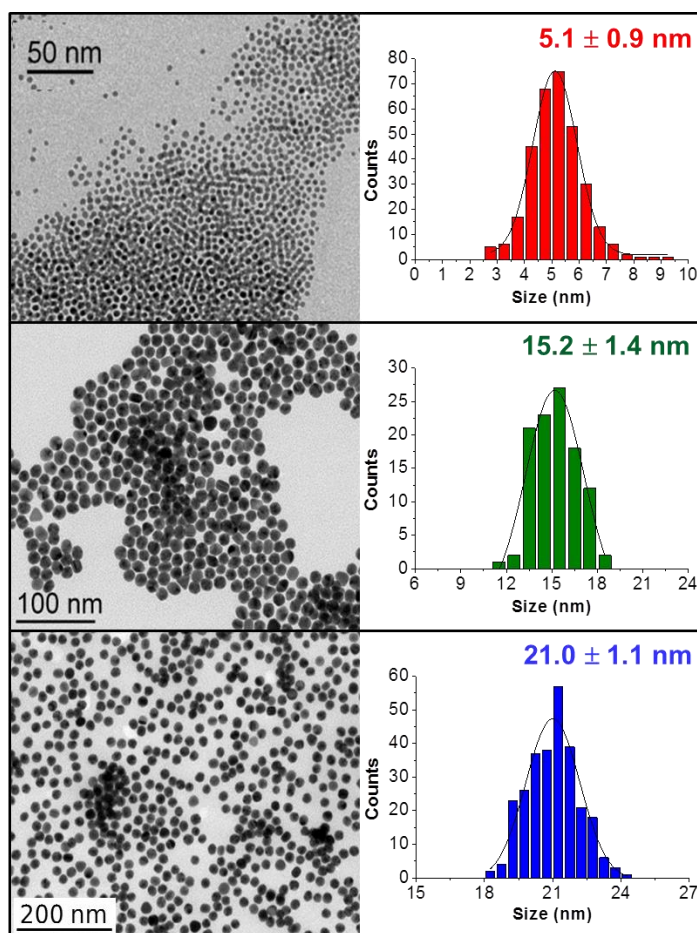

**Figure S1.** TEM images and size histograms of TDSP-stabilized gold nanoparticles.

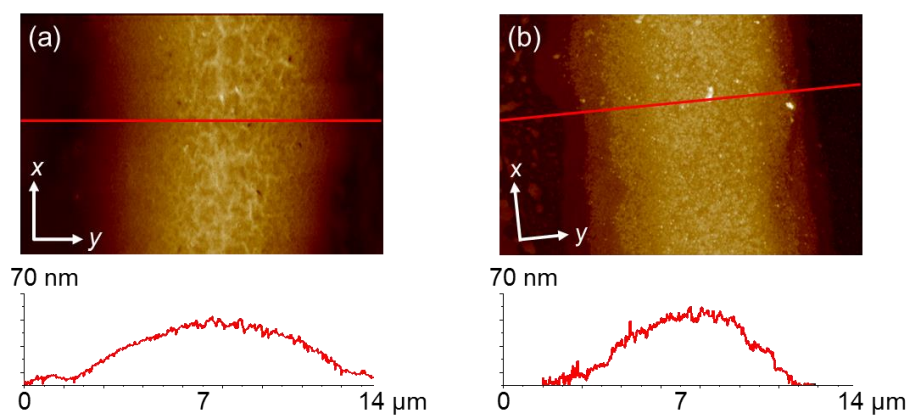

**Figure S2.** Top-view AFM images and associated cross-sections of wires made of (a) 5 nm and (b) 21 nm TDSP-stabilized nanoparticles on PET substrates.

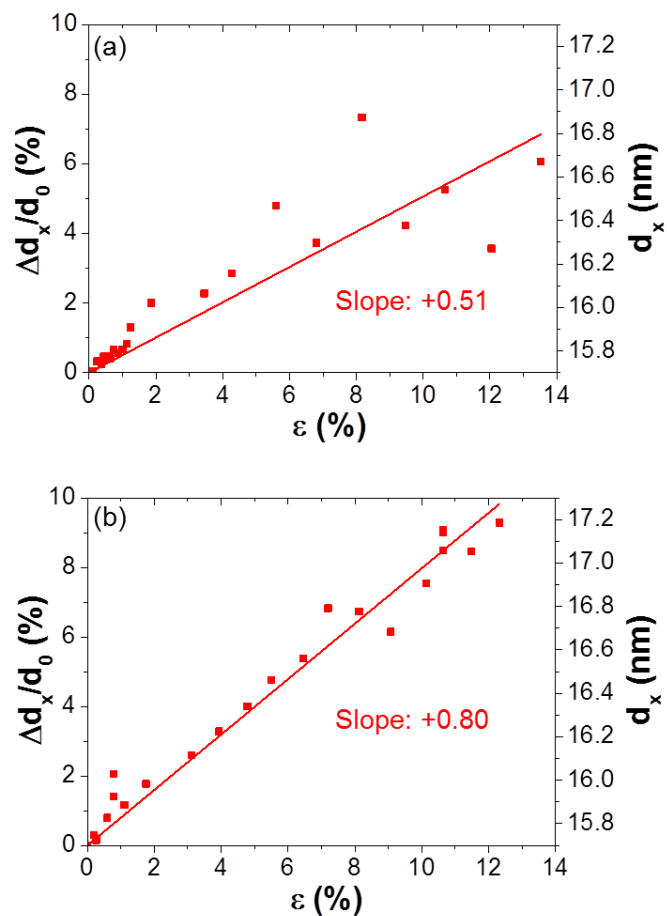

**Figure S3.** Evolution of the relative NP center-to-center distance  $\Delta d_x/d_0$  measured by GISAXS with respect to the strain  $\epsilon$  applied along the  $x$  axis, for 15 nm NP-based strain gauges on (a) PET and (b) PI substrates.

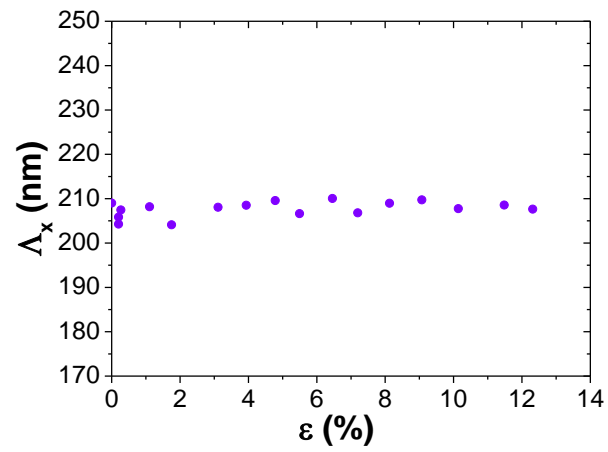

**Figure S4.** Evolution of the correlation length  $\Delta_x$  measured by SAXS with respect to the strain  $\varepsilon$  applied along the  $x$  axis, for a 15 nm NP-based strain gauge on PI substrate.

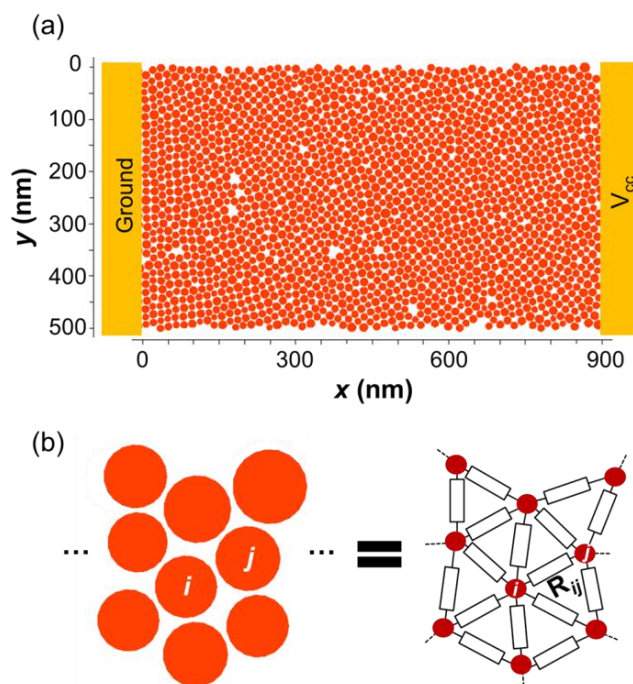

**Figure S5.** (a) Model hexagonally-packed assembly of gold nanoparticles with a mean diameter of 15 nm and a size dispersion of 10%, separated from each other by a distance of 0.8 nm at zero strain, (b) zoom-in of the hexagonally-packed assembly of gold nanoparticles presented in (a) and the associated resistor network, used for modeling.
